# Supplementary material for: In situ loading of well-dispersed silver nanoparticles on nanocrystalline magnesium oxide for real-time monitoring of catalytic reactions by surface enhanced Raman spectroscopy
Source: Royal Society of Chemistry journal article supplement (doi:10.1039/c5nr05718c), 2015-01-01
Supplement: c5nr05718c1.pdf [file c5nr05718c1.pdf]

## Electronic Supplementary Information

**In-situ loading of well-dispersive silver nanoparticles on  
nanocrystalline magnesium oxide for real-time monitoring of  
catalytic reactions by surface enhancement Raman spectroscopy**

Kaige Zhang, Gongke Li\*, Yuling Hu\*

*School of Chemistry and Chemical Engineering, Sun Yat-sen University, Guangzhou,  
Guangdong 510275, P.R. China*

\* Corresponding author: G.K. Li, Y.L. Hu

Tel. : +86-20-84110922

Fax : +86-20-84115107

E. mail : cesgkl@mail.sysu.edu.cn

ceshyl@mail.sysu.edu.cn.

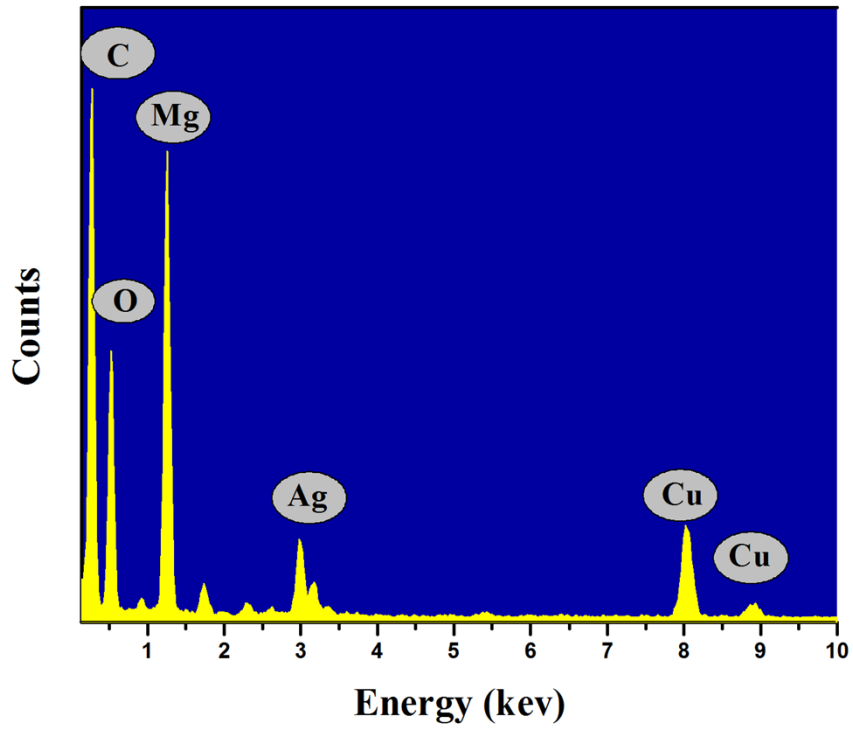

SI Fig.1 EDX micrograph of the nano MgO-Ag(0)

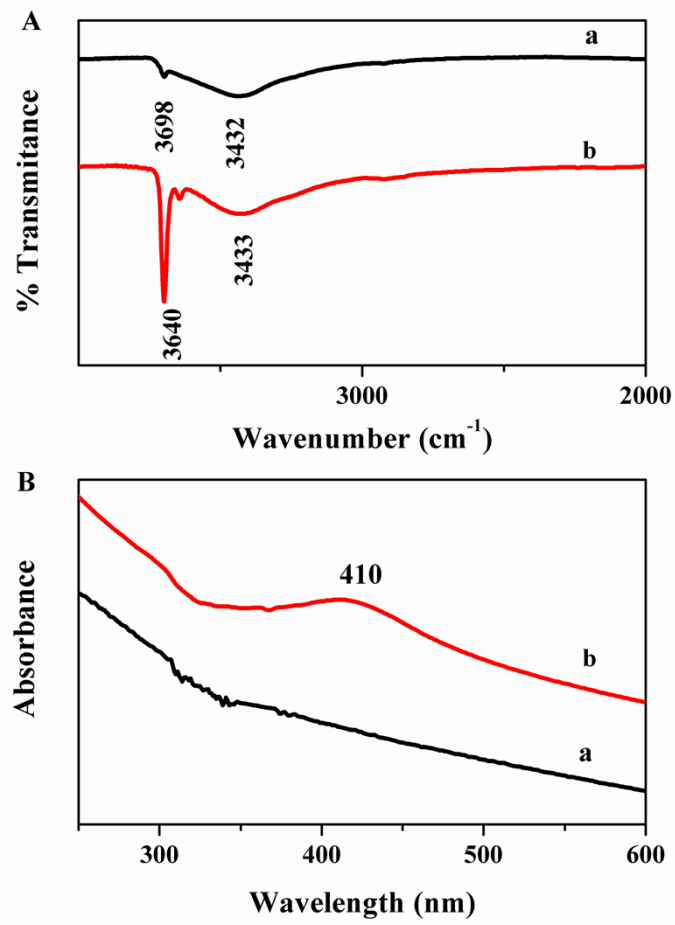

SI Fig. 2 (A) IR and (B) UV-vis spectra of (a) nano-MgO and (b) nano MgO-Ag(0)

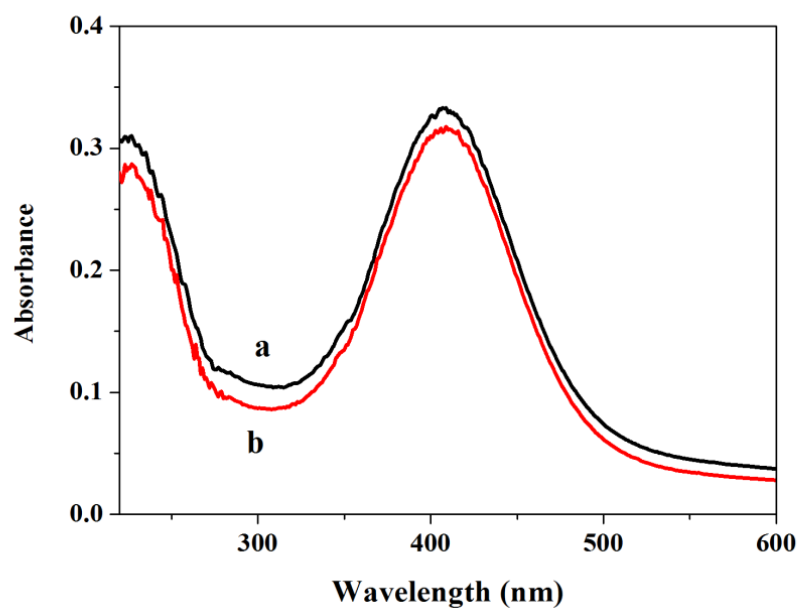

SI Fig. 3 UV-vis absorption spectra of the reduction of 4-NTP by NaBH<sub>4</sub> without (a) or with (b) nano-MgO as catalyst

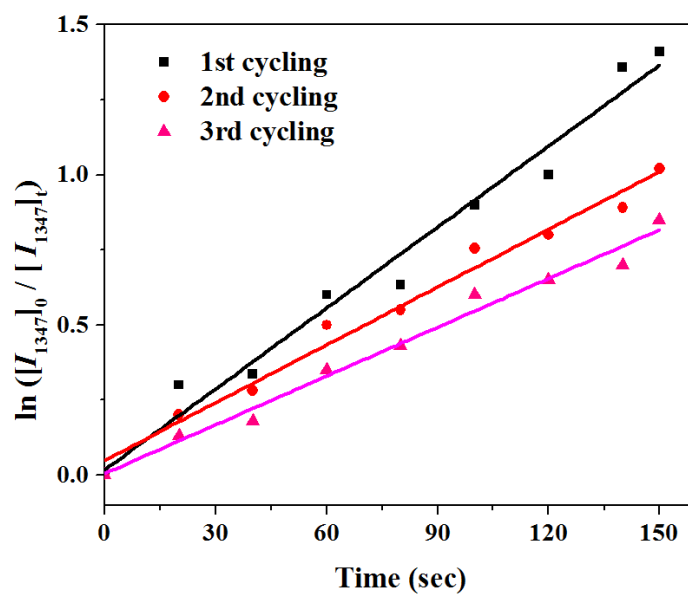

SI Fig. 4 Three cycles of catalytic activity of the nano MgO-Ag(0) nanostructures hybrids in decomposing 4-NTP. The solid lines are linear fits to the measured data points (symbols).

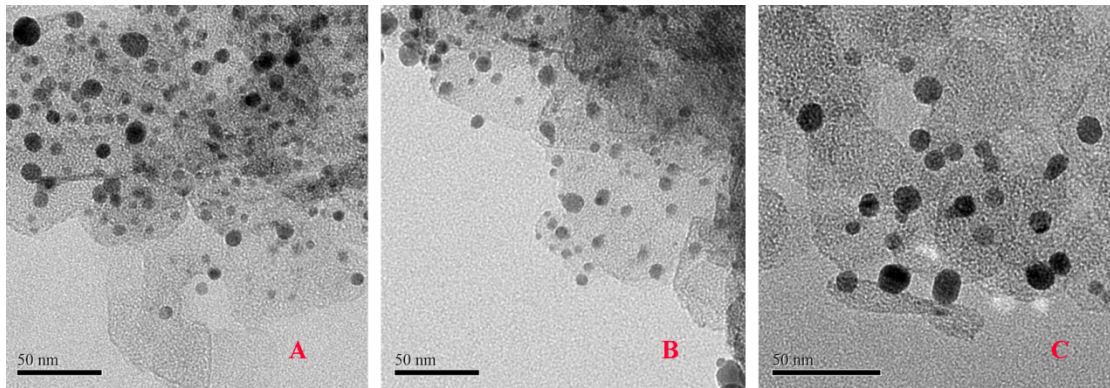

SI Fig. 5 TEM images of nano MgO-Ag(0) nanostructures after (A) one, (B) two, and (c) three cycles.

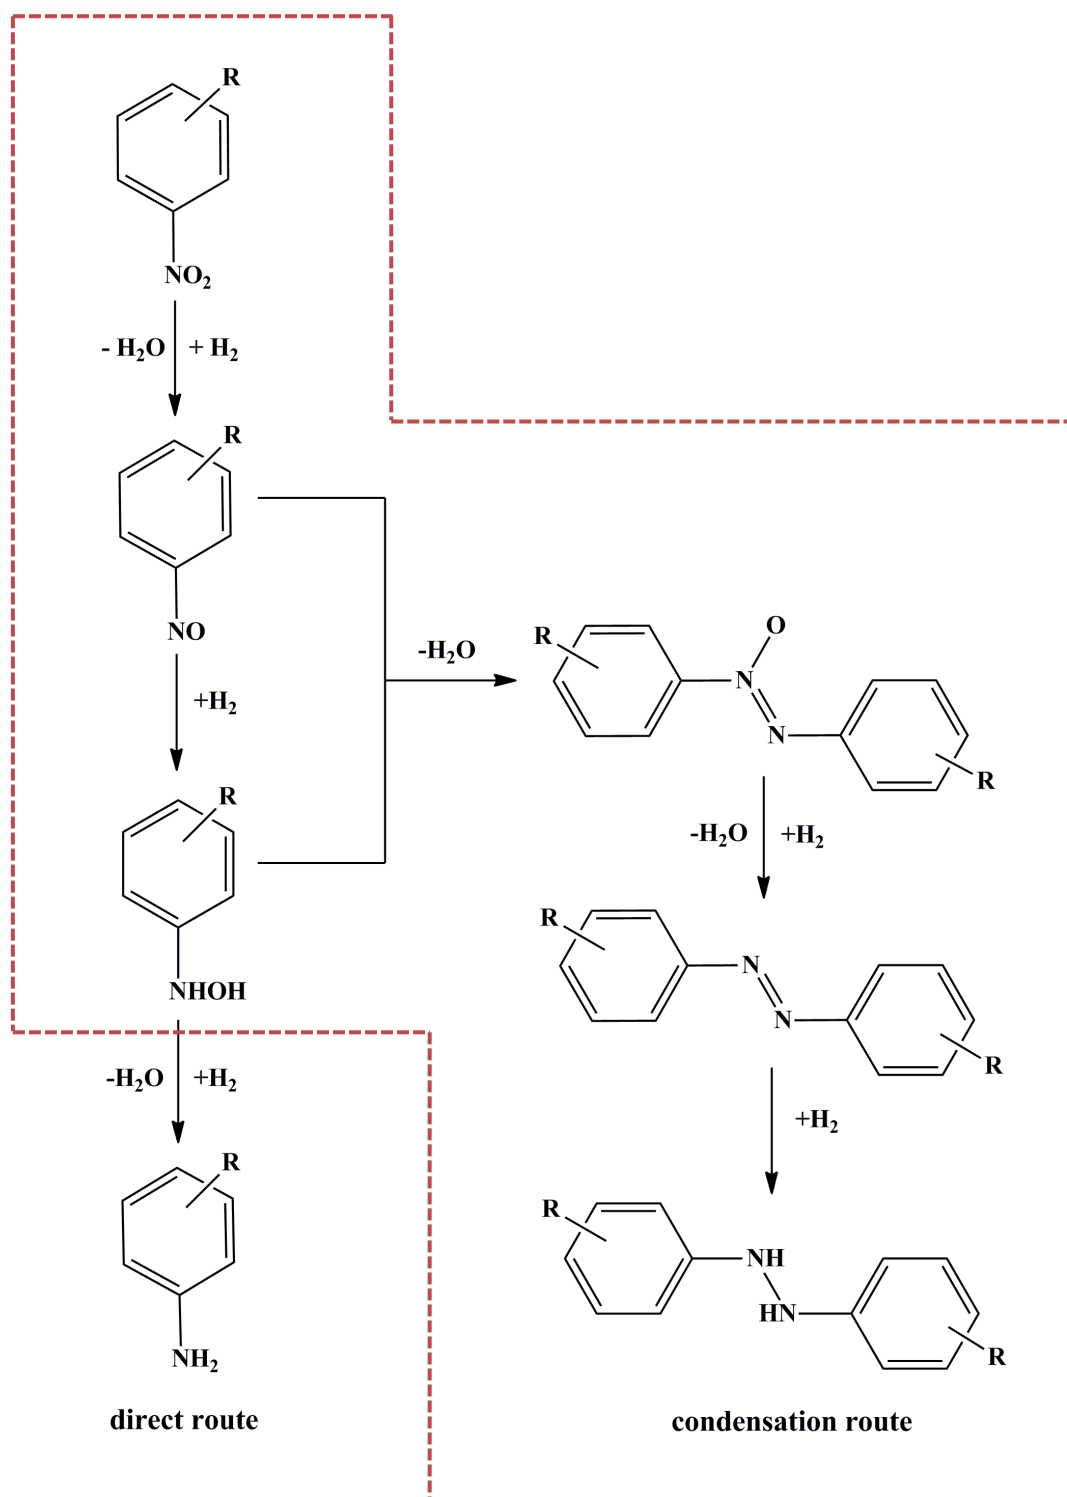

SI Fig. 6 Proposed reaction pathways for the reduction of aromatic nitro group to amino group<sup>1</sup>

## References

- 1 H. F. Gradual, *Z. Elektrochem.*, 1898, **4**, 506-513.
